# Supplementary material for: svm PRAT: SVM-based Protein Residue Annotation Toolkit
Source: Springer Nature journal article supplement (doi:10.1186/1471-2105-10-439), 2009-12-01

Example Sequence: FVNQHLCGSHLVEALYLVCGERGFFYTPKA

(a)

|   | A  | R  | N  | D  | C  | Q  | E  | G  | H  | I  | L  | K  | M  | F  | P  | S  | T  | W  | Y  | V  |
|---|----|----|----|----|----|----|----|----|----|----|----|----|----|----|----|----|----|----|----|----|
| F | -3 | -3 | -4 | -4 | -3 | -3 | -4 | -4 | -2 | 0  | 2  | -4 | 0  | 7  | -4 | -3 | -3 | 0  | 4  | -1 |
| V | -1 | -3 | -3 | -1 | -2 | -2 | -2 | -3 | -3 | 1  | -1 | -2 | -1 | -3 | 5  | 0  | -1 | -4 | -3 | 4  |
| N | -1 | -1 | 5  | 0  | -3 | -1 | -1 | -2 | -1 | -2 | -3 | 0  | -3 | -4 | 3  | 2  | 1  | -4 | -3 | -3 |
| Q | -2 | 1  | -1 | -1 | -4 | 7  | 2  | -3 | 0  | -4 | -3 | 1  | -1 | -4 | -1 | -1 | -1 | -3 | -2 | -3 |
| H | -2 | 1  | 0  | -2 | -4 | 0  | -1 | -3 | 9  | -4 | -3 | -1 | -2 | -2 | -3 | -1 | 0  | -3 | 2  | -3 |
| L | -2 | -3 | -4 | -5 | -2 | -3 | -4 | -5 | -4 | 1  | 5  | -3 | 2  | 0  | -4 | -3 | -2 | -2 | -2 | 0  |
| C | -1 | -4 | -3 | -4 | 10 | -4 | -4 | -3 | -4 | -2 | -2 | -4 | -2 | -3 | -4 | 0  | -1 | -3 | -3 | -2 |
| G | -1 | -3 | -1 | -2 | -3 | -3 | -3 | 7  | -3 | -5 | -5 | -2 | -4 | -4 | -3 | -1 | -2 | -3 | -4 | -4 |
| S | 1  | -1 | 0  | -1 | -2 | -1 | -1 | 0  | -2 | -3 | -3 | 0  | -2 | -3 | 0  | 5  | 0  | -4 | -3 | -2 |
| H | -2 | -1 | 2  | 1  | -4 | 1  | 2  | -3 | 8  | -4 | -4 | -1 | -3 | -2 | -3 | -1 | -2 | -3 | 1  | -4 |
| L | -2 | -3 | -4 | -5 | -2 | -3 | -4 | -5 | -4 | 1  | 5  | -3 | 1  | 0  | -4 | -3 | -2 | -2 | -2 | 0  |
| V | -1 | -3 | -4 | -4 | -2 | -3 | -3 | -4 | -4 | 2  | 0  | -3 | 0  | -2 | -3 | -3 | -1 | -4 | -2 | 6  |
| E | -2 | -1 | 1  | 4  | -5 | 1  | 5  | -3 | -1 | -4 | -4 | 0  | -3 | -4 | -2 | -1 | -2 | -4 | -3 | -4 |
| A | 5  | -2 | -2 | -3 | -1 | -2 | -2 | -1 | -2 | -2 | -2 | -1 | -2 | -3 | -2 | 1  | 1  | -3 | -3 | -1 |
| L | -2 | -3 | -4 | -5 | -2 | -3 | -4 | -5 | -4 | 1  | 5  | -3 | 1  | 0  | -4 | -3 | -2 | -2 | -2 | 0  |
| Y | -2 | -2 | -3 | -3 | -3 | 1  | 0  | -4 | 1  | -2 | -2 | -2 | -2 | 3  | -4 | -2 | -2 | 1  | 8  | -2 |
| L | -2 | -3 | -4 | -4 | -2 | -3 | -4 | -4 | -3 | 1  | 4  | -3 | 3  | 3  | -4 | -1 | -2 | -2 | -1 | 0  |
| V | 0  | -3 | -4 | -4 | -2 | -3 | -3 | -4 | -4 | 2  | 0  | -3 | 0  | -2 | -3 | -2 | 0  | -4 | -2 | 5  |
| C | -1 | -4 | -3 | -4 | 10 | -4 | -4 | -3 | -4 | -2 | -2 | -4 | -2 | -3 | -4 | 0  | -1 | -3 | -3 | -2 |
| G | 0  | -3 | -1 | -2 | -3 | 0  | -3 | 6  | -3 | -5 | -4 | -2 | -3 | -4 | -3 | -1 | -2 | -3 | -4 | -4 |
| E | -2 | 0  | 0  | 4  | -4 | 0  | 5  | -3 | -1 | -3 | -3 | 0  | -3 | -4 | 1  | -1 | -2 | -4 | -3 | -1 |
| R | -2 | 6  | 0  | 0  | -4 | 0  | -1 | -3 | -1 | -4 | -3 | 2  | -2 | -4 | -3 | 0  | -1 | -4 | -3 | -3 |
| G | -1 | -3 | -1 | -2 | -3 | -3 | -3 | 7  | -3 | -5 | -5 | -2 | -4 | -4 | -3 | -1 | -2 | -3 | -4 | -4 |
| F | -3 | -4 | -4 | -4 | -3 | -4 | -4 | -2 | -2 | -1 | 0  | -4 | -1 | 8  | -5 | -3 | -3 | 0  | 2  | -2 |
| F | -3 | -3 | -4 | -4 | -3 | -4 | -4 | -4 | -1 | -1 | -1 | -4 | -1 | 7  | -4 | -3 | -3 | 1  | 5  | -2 |
| Y | -3 | -3 | -3 | -4 | -3 | -3 | -3 | -4 | 1  | -2 | -2 | -3 | -2 | 4  | -4 | -3 | -3 | 1  | 8  | -2 |
| T | -1 | -1 | 3  | 1  | -2 | 0  | -1 | -2 | -2 | 0  | -2 | -1 | -2 | -3 | -1 | 2  | 4  | -4 | -2 | -1 |
| P | -2 | -3 | -3 | -1 | -4 | -2 | -2 | -3 | -3 | -4 | -4 | -2 | -3 | -5 | 8  | -1 | -1 | -5 | -4 | -3 |
| K | -2 | 3  | -1 | 0  | -4 | 1  | 0  | -2 | -1 | -3 | -2 | 6  | 0  | -4 | -2 | -1 | -1 | -4 | -3 | -3 |
| A | 3  | -2 | -1 | -2 | -1 | -1 | -1 | 2  | -2 | -2 | -2 | -1 | -2 | -3 | -2 | 2  | 3  | -3 | -3 | -1 |

wmer: EALYLVC

(b)

| E | -2 | -1 | 1  | 4  | -5 | 1  | 5  | -3 | -1 | -4 | -4 | 0  | -3 | -4 | -2 | -1 | -2 | -4 | -3 | -4 |
|---|----|----|----|----|----|----|----|----|----|----|----|----|----|----|----|----|----|----|----|----|
| A | 5  | -2 | -2 | -3 | -1 | -2 | -2 | -1 | -2 | -2 | -2 | -1 | -2 | -3 | -2 | 1  | 1  | -3 | -3 | -1 |
| L | -2 | -3 | -4 | -5 | -2 | -3 | -4 | -5 | -4 | 1  | 5  | -3 | 1  | 0  | -4 | -3 | -2 | -2 | -2 | 0  |
| Y | -2 | -2 | -3 | -3 | -3 | 1  | 0  | -4 | 1  | -2 | -2 | -2 | -2 | 3  | -4 | -2 | -2 | 1  | 8  | -2 |
| L | -2 | -3 | -4 | -4 | -2 | -3 | -4 | -4 | -3 | 1  | 4  | -3 | 3  | 3  | -4 | -1 | -2 | -2 | -1 | 0  |
| V | 0  | -3 | -4 | -4 | -2 | -3 | -3 | -4 | -4 | 2  | 0  | -3 | 0  | -2 | -3 | -2 | 0  | -4 | -2 | 5  |
| C | -1 | -4 | -3 | -4 | 10 | -4 | -4 | -3 | -4 | -2 | -2 | -4 | -2 | -3 | -4 | 0  | -1 | -3 | -3 | -2 |

(c)

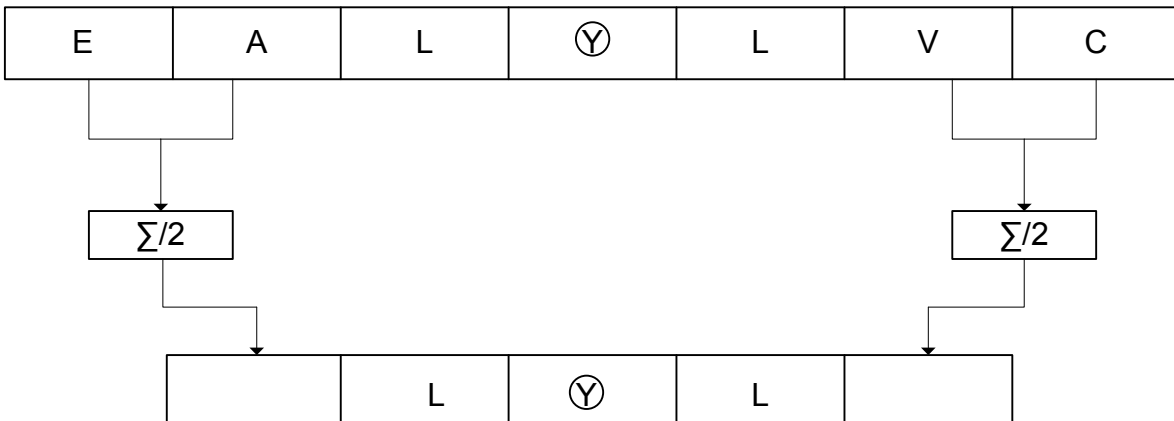

Supplement: 12859_2009_3169_MOESM1_ESM.pdf [file 12859_2009_3169_MOESM1_ESM.pdf]
